# Supplementary material for: Biologically inspired micro-robotic swimmers remotely controlled by ultrasound waves
Source: Royal Society of Chemistry journal article supplement (doi:10.1039/d1lc00575h), 2021-01-01
Supplement: d1lc00575h1.pdf [file d1lc00575h1.pdf]

## Supplementary Information for

### Biologically inspired micro-robotic swimmers remotely controlled by ultrasound waves

Tao Luo<sup>a,b</sup>, and Mingming Wu<sup>b\*</sup>

<sup>a</sup>Departments of Biological and Environmental Engineering, Cornell University, Ithaca, NY 14853;

<sup>b</sup>Department of Mechanical and Electrical Engineering, Xiamen University, Xiamen 361005, China.

\*Mingming Wu

Email: mw272@cornell.edu

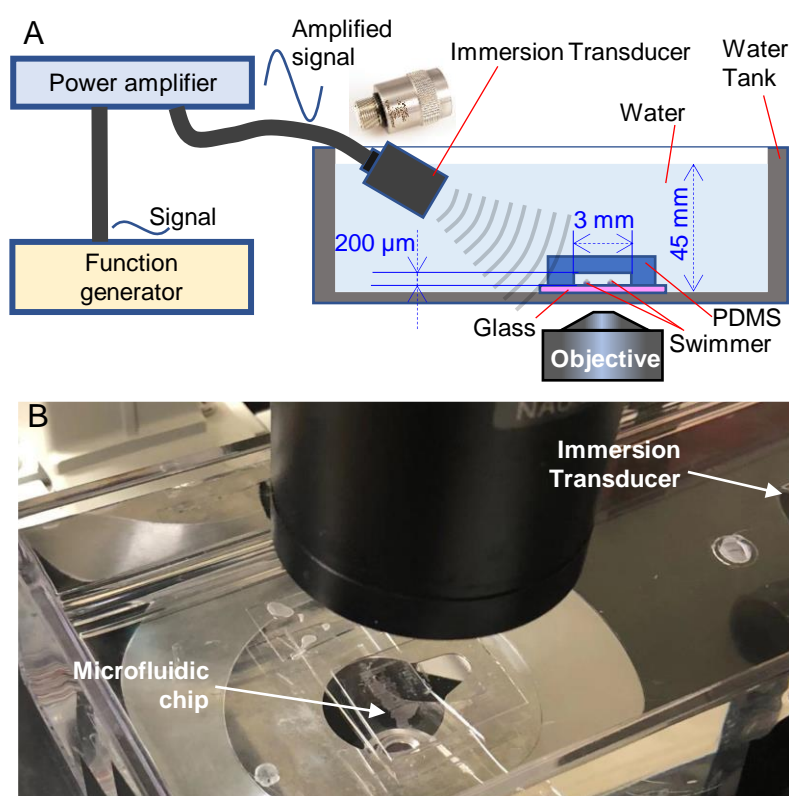

**Fig. S1. Experimental setup.** (A) A schematic of the experimental setup. A function generator together with a power amplifier (with fixed amplification of 50 dB) are used to power the transducer. The immersion transducer was submerged in the water in a 4 x 2 x 12 inch<sup>3</sup> rectangular cuboid tank, and a PDMS microfluidic channel 3 mm in width, 200 μm in height, and ~4 cm in length is bonded on a 1 mm-thick and 1 inch x 3 inch glass slide. The micro-swimmers are seeded within the microfluidic channel. (B) A photo of the experimental setup with the immersion transducer and microfluidic chip on the stage of a microscope.

**Movie S1 (separate file). Selective excitation of microbubbles with different sizes of air-fluid interface.** Movies of two one-bubble swimmers with opening  $d = 8 \mu\text{m}$  and  $10 \mu\text{m}$  respectively, each anchored on a substrate. The acoustic streaming flows are generated by the oscillating microbubbles and visualized by fluorescence marker beads. At ultrasound frequency  $f = 300 \text{ kHz}$ ,

strong streaming flow is observed for swimmer with an opening of diameter  $d = 10\text{ }\mu\text{m}$ ; and at  $f = 396\text{ kHz}$ , strong streaming flow is observed for swimmer with opening diameter of  $d = 8\text{ }\mu\text{m}$ . The movies are taken at 20 fps, and sped up 2x.

**Movie S2 (separate file). Movies showing initial attitude adjustment.** A time series of the microscopic images taken by an inverted microscope (10X Objective), showing the attitude adjustment process from a bottom view. The size of the image is  $215 \times 215\text{ }\mu\text{m}$ , and the time between consecutive images is 50 ms.  $t = 0$  is defined as when the ultrasound is turned on.

**Movie S3 (separate file). A microswimmer swims close to a substrate.** A movie taken by an inverted microscope (10X Objective) shows that a micro-swimmer is always in focus during the 16 s filming time indicating that they always stay close to the substrate. The movie is taken at 20 fps, and sped up 3x.  $t = 0$  is defined as when the ultrasound is turned on.

**Movie S4 (separate file). Robotic microswimmer moves along the wall of the microfluidic channel.** A movie taken by an inverted microscope (10X Objective) shows that a swimmer swims along the wall of a microfluidic channel. The movie is taken at 20 fps, and sped up 3x.  $t = 0$  is defined as when the ultrasound is turned on.

**Movie S5 (separate file). Locomotion of micro-swimmer controlled by ultrasound waves.** At ultrasound frequency 301 kHz, the micro-swimmer follows a linear trajectory, and increases its speed with the input voltage to the ultrasound transducer. At ultrasound frequency 234 kHz, the micro-swimmer swims in circles, its speed also increases with the input voltage to the ultrasound. The yellow line shows the trajectories of the swimmer. The real-time movie is taken by an inverted microscope (10X Objective) at 20 fps, and sped up 3x.  $t = 0$  is defined as when the ultrasound is turned on.

**Movie S6 (separate file). Making a left turn.** The left turn is controlled by switching the ultrasound frequency from 342 to 218 kHz at  $t = 20.8\text{ s}$  and switching it back at  $t = 43\text{ s}$ . The duration of the movie is 60 s. The movie is taken at 20 fps, and sped up 4x.  $t = 0$  is defined as when the ultrasound is turned on.

**Movie S7 (separate file). Making a right turn.** The right turn is controlled by switching ultrasound frequency from 328 to 234 kHz at  $t = 7.5\text{ s}$ , and switching it back at  $t = 15\text{ s}$ . The duration of the movie is 20 s. The movie is taken at 20 fps, and sped up 4x.  $t = 0$  is defined as when the ultrasound is turned on.
